# Supplementary material
Source: MDPI journal article supplement (https://www.mdpi.com/2079-9284/8/3/78)
Supplement: s1 [file s1]

Archive with 3 entries (3 files):
- cosmetics-1338861-Document S1.pdf
- cosmetics-1338861-TableS1 and Table S2.pdf
- cosmetics-1339961-Document S2.pdf
