# Supplementary material
Source: MDPI journal article supplement (https://www.mdpi.com/2079-9284/8/3/78)
Supplement: s1 [file s1 › cosmetics-1338861-TableS1 and Table S2.pdf]

## Article

# An Exploratory Study of Consumers' Knowledge and Attitudes about Lignin-Based Sunscreens and Bio-Based Skincare Products

Nežka Sajinčič <sup>1</sup>, Oihana Gordobil <sup>1,\*</sup>, Amy Simmons <sup>1</sup> and Anna Sandak <sup>1,2</sup>

<sup>1</sup> InnoRenew CoE, Izola 6310, Slovenia; nezka.sajincic@innorenew.eu (N.S.), amy.simmons@innorenew.eu (A.S.), anna.sandak@innorenew.eu (A.S.)

<sup>2</sup> Natural Sciences and Information Technologies, Faculty of Mathematics, University of Primorska, Koper 6000, Slovenia

\* Correspondence: oihana.gordobil@innorenew.eu

## Supplementary Materials:

**Citation:** Sajinčič, N.; Gordobil, O.; Simmons, A.; Sandak, A. An Exploratory Study of Consumers' Knowledge and Attitudes about Lignin-Based Sunscreens and Bio-Based Skincare Products. *Cosmetics* **2021**, *8*, 78. <https://doi.org/10.3390/8030078>

Academic Editor: Isabel Martins de Almeida

Received: 28 July 2021

Accepted: 24 August 2021

Published: 27 August 2021

**Publisher's Note:** MDPI stays neutral with regard to jurisdictional claims in published maps and institutional affiliations.

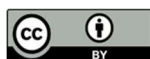

**Copyright:** © 2021 by the authors. Submitted for possible open access publication under the terms and conditions of the Creative Commons Attribution (CC BY) license (<https://creativecommons.org/licenses/by/4.0/>).

Table S1. Socio-demographic data.

| Variable                         | Categories                                                                                                                                                    | n (%)        |
|----------------------------------|---------------------------------------------------------------------------------------------------------------------------------------------------------------|--------------|
| Age                              | 18–25                                                                                                                                                         | 41 (17.83%)  |
|                                  | 26–35                                                                                                                                                         | 94 (40.87%)  |
|                                  | 36–45                                                                                                                                                         | 47 (20.43%)  |
|                                  | 46–55                                                                                                                                                         | 36 (15.65%)  |
|                                  | 56–65                                                                                                                                                         | 8 (3.48%)    |
|                                  | 66 +                                                                                                                                                          | 2 (0.87%)    |
| Gender                           | Undisclosed                                                                                                                                                   | 2 (0.87%)    |
|                                  | Female                                                                                                                                                        | 166 (72.17%) |
|                                  | Male                                                                                                                                                          | 58 (25.22%)  |
|                                  | Non-binary                                                                                                                                                    | 1 (0.43%)    |
| Educational level                | Undisclosed                                                                                                                                                   | 5 (2.15%)    |
|                                  | Primary                                                                                                                                                       | 1 (0.42%)    |
|                                  | Secondary                                                                                                                                                     | 17 (7.39%)   |
|                                  | Bachelor's degree                                                                                                                                             | 61 (26.52%)  |
|                                  | Master's degree                                                                                                                                               | 92 (40.00%)  |
|                                  | Doctorate                                                                                                                                                     | 53 (23.04%)  |
| Occupation                       | Undisclosed                                                                                                                                                   | 6 (2.61%)    |
|                                  | Student                                                                                                                                                       | 42 (18.26%)  |
|                                  | Employed                                                                                                                                                      | 157 (68.26%) |
|                                  | Unemployed                                                                                                                                                    | 12 (5.22%)   |
|                                  | Retired                                                                                                                                                       | 6 (2.61%)    |
|                                  | Other                                                                                                                                                         | 8 (3.48%)    |
|                                  | Undisclosed                                                                                                                                                   | 5 (2.17%)    |
|                                  | Slovenia                                                                                                                                                      | 156 (67.83%) |
| Country of residence             | Spain                                                                                                                                                         | 20 (8.70%)   |
|                                  | France, USA                                                                                                                                                   | 6 (2.61%)    |
|                                  | Italy                                                                                                                                                         | 5 (2.17%)    |
|                                  | Undisclosed                                                                                                                                                   | 4 (1.74%)    |
|                                  | Finland, United Kingdom                                                                                                                                       | 3 (1.30%)    |
|                                  | Croatia, Germany, India, Poland, Romania, Turkey                                                                                                              | 2 (0.87%)    |
|                                  | Austria, Australia, Belgium, Bosnia and Herzegovina, Brazil, Canada, Czech Republic, Iran, Mexico, Nepal, Pakistan, Philippines, Sweden, Switzerland, Ukraine | 1 (0.43%)    |
|                                  | Very good                                                                                                                                                     | 13 (5.65%)   |
| Subjective socio-economic status | Good                                                                                                                                                          | 88 (38.26%)  |
|                                  | Fair                                                                                                                                                          | 109 (47.39%) |
|                                  | Poor                                                                                                                                                          | 14 (6.09%)   |
|                                  | Very poor                                                                                                                                                     | 1 (0.43%)    |
|                                  | Undisclosed                                                                                                                                                   | 5 (2.17%)    |
|                                  | I                                                                                                                                                             | 35 (15.22%)  |
| Fitzpatrick skin type            | II                                                                                                                                                            | 77 (33.48%)  |
|                                  | III                                                                                                                                                           | 79 (34.35%)  |
|                                  | IV                                                                                                                                                            | 29 (12.61%)  |
|                                  | V                                                                                                                                                             | 8 (3.48%)    |
|                                  | Undisclosed                                                                                                                                                   | 2 (0.87%)    |

**Table S2.** Data dictionary of numerical variables that were merged or single items representing a construct.

| Variable Name          | Variable Description                                                                                          | Included Items (Item's Code)                                                                                                        | Formula | Values |
|------------------------|---------------------------------------------------------------------------------------------------------------|-------------------------------------------------------------------------------------------------------------------------------------|---------|--------|
| Knowledge              | Knowledge and awareness about the relation between sunscreen, health, the environment, and bio-based skincare | *Solar radiation is harmless. (Q9a)                                                                                                 |         |        |
|                        |                                                                                                               | *Having a tan is healthy. (Q9b)                                                                                                     |         |        |
|                        |                                                                                                               | Skincare products help to fight the effects of ageing. (Q9c)                                                                        |         |        |
|                        |                                                                                                               | Use of sunscreens can prevent sunburns, skin damage, skin ageing and skin cancer. (Q9d)                                             |         |        |
|                        |                                                                                                               | *The official recommendation is to always use a broad-spectrum sunscreen with SPF 50 or higher. (Q9e)                               |         |        |
|                        |                                                                                                               | Ingredients from skincare and sunscreen products are being continuously released into the environment. (Q10a)                       |         |        |
|                        |                                                                                                               | Synthetic UV filters, antioxidants, and preservatives are common ingredients in skincare. (Q10b)                                    |         |        |
|                        |                                                                                                               | Chemicals from skincare products tend to accumulate in living organisms. (Q10c)                                                     |         |        |
|                        |                                                                                                               | Chemicals from skincare products have been detected in human fluids, such as urine, semen, breast milk, and the bloodstream. (Q10d) |         |        |
|                        |                                                                                                               | *Chemicals from skincare products are harmless to ecosystems. (Q10e)                                                                |         |        |
| Purchase behaviour     | Purchasing behaviour related to bio-based skincare                                                            | Chemicals can cause dermatological side effects (skin allergies or irritation). (Q10f)                                              |         |        |
|                        |                                                                                                               | I usually check the ingredients of the products when buying it. (Q9f)                                                               |         |        |
|                        |                                                                                                               | I tend to buy skincare products with ingredients of natural origin. (Q9g)                                                           |         |        |
| Purchase intention     | Intention to purchase bio-based skincare products in the future                                               | I am willing to pay more for a bio-based skincare product if it is free of chemicals. (Q16d)                                        |         |        |
|                        |                                                                                                               | I will buy skincare products containing mainly bio-based ingredients in the future. (Q16h)                                          |         |        |
|                        |                                                                                                               | *Artificially made/synthetic ingredients are more efficient than natural ingredients. (Q9h)                                         |         |        |
| Bio-based attitude     | Attitude towards bio-based ingredients                                                                        | In addition to the origin of the ingredients, a sustainable method for their production is also important. (Q10g)                   |         |        |
|                        |                                                                                                               | The environmental impact of synthetic ingredients concerns me. (Q10i)                                                               |         |        |
|                        |                                                                                                               | The use of bio-based ingredients in skincare products would have a positive impact on the environment. (Q16a)                       |         |        |
|                        |                                                                                                               | *Plant-derived ingredients cannot replace synthetic ingredients. (Q16b)                                                             |         |        |
|                        |                                                                                                               | Skincare products containing bio-based ingredients are healthier for my skin than products with synthetic ingredients. (Q16c)       |         |        |
|                        |                                                                                                               | *Skincare products with bio-based ingredients are usually more expensive than synthetics. (Q16e)                                    |         |        |
|                        |                                                                                                               | *Good functionality/performance is what matters, not the origin of the ingredients. (Q16f)                                          |         |        |
|                        |                                                                                                               | *I prefer conventional chemical ingredients over bio-based ingredients. (Q16g)                                                      |         |        |
|                        |                                                                                                               | Obtaining bio-based ingredients from agricultural waste is innovative. (Q16i)                                                       |         |        |
|                        |                                                                                                               | *I would not want to use skincare/suncare products that are brownish in colour. (Q16j)                                              |         |        |
| Skincare interest      | Self-assessed level of interest in skincare                                                                   | Skincare interests me. (Q10h)                                                                                                       |         |        |
| Health attitude        | Health consciousness; the person's awareness and readiness to do something about their health                 | I take good care of my health. (Q10j)                                                                                               |         |        |
| Environmental attitude | The tendency to evaluate the natural environment with a certain level of favourableness                       | Protecting and preserving the environment should have priority over economic growth and development. (Q10k)                         |         |        |

$$= (Q9aR + Q9bR + Q9c + Q9d + Q9eR + Q10a + Q10b + Q10c + Q10d + Q10eR + Q10f) / 11$$

$$= (Q9f + Q9g + Q16d) / 3$$

$$= Q16h$$

1—Strongly disagree  
2—Disagree  
3—Neither agree nor disagree  
4—Agree  
5—Strongly agree  
-99—Do not know

$$= (Q9hR + Q10g + Q10i + Q16a + Q16bR + Q16c + Q16eR + Q16fR + Q16gR + Q16i + Q16jR) / 11$$

$$= Q10h$$

$$= Q10j$$

$$= Q10k$$

|                       |                                                      |                                                                                                                                                                                                                                                                                                                                                                                                                                                                                                            |                                             |                                                                                                                                                  |
|-----------------------|------------------------------------------------------|------------------------------------------------------------------------------------------------------------------------------------------------------------------------------------------------------------------------------------------------------------------------------------------------------------------------------------------------------------------------------------------------------------------------------------------------------------------------------------------------------------|---------------------------------------------|--------------------------------------------------------------------------------------------------------------------------------------------------|
| Familiarity bio-based | Self-assessed familiarity with bio-based ingredients | Please choose the answer that best describes how familiar you were with the following subjects before this survey.<br>Bio-based ingredients (substances of natural origin) for skincare (Q14b)<br>Biopolymers (large molecules from plants or animals) from nature can be used as an ingredient for skincare and sun protection products. (Q14c)<br>Natural biopolymers can be obtained from wood and plants, but also from renewable sourced leftover (residue) and waste materials from industry. (Q14d) | $= (Q14b + Q14c + Q14d) / 3$                | 1—I have never heard about it before<br>2—I have heard about it, but do not know much of it<br>3—I am familiar with the topic<br>-99—Do not know |
|                       |                                                      |                                                                                                                                                                                                                                                                                                                                                                                                                                                                                                            |                                             |                                                                                                                                                  |
| Familiarity lignin    | Self-assessed familiarity with lignin                | Please choose the answer that best describes how familiar you were with the following subjects before this survey.<br>Lignin (Q14a)                                                                                                                                                                                                                                                                                                                                                                        | $= Q14a$                                    |                                                                                                                                                  |
| Buy lignin            | Willingness to buy a lignin-based sunscreen          | Would you buy a skincare product containing this ingredient? (Q18)                                                                                                                                                                                                                                                                                                                                                                                                                                         | $= Q18R$                                    | 1—Yes<br>2—Probably<br>3—Maybe<br>4—No<br>-99—Do not know                                                                                        |
| Skincare use          | Frequency of using skincare products                 | How often do you use the following skincare products?<br>Cleanser (Q1a)<br>Moisturizer on the face (Q1b)<br>Moisturizer on the body (Q1c)<br>Repair or anti-ageing products (antioxidants, serums, exfoliators, etc.) (Q1d)                                                                                                                                                                                                                                                                                | $= (Q1a + Q1b + Q1c + Q1d + Q1e + Q1f) / 6$ | 1—Never<br>2—Rarely<br>3—Sometimes<br>4—Often<br>5—Always<br>-99—Do not know                                                                     |
|                       |                                                      | Sunscreen on the face (Q1e)<br>Sunscreen on the body (Q1f)                                                                                                                                                                                                                                                                                                                                                                                                                                                 |                                             |                                                                                                                                                  |
| Sunscreen use         | Frequency of using sunscreen                         | How often do you use sunscreen in the following conditions?<br>On warm sunny days (Q2a)<br>On cloudy days (Q2b)<br>At the beach (Q2c)<br>During recreation (e.g., jogging, cycling, walking, hiking) (Q2d)<br>While doing outdoor domestic chores (e.g., lawn mowing, snow removal, gardening) (Q2e)<br>While doing outdoor job-related tasks (e.g., construction work, delivery) (Q2f)                                                                                                                    | $= (Q2a + Q2b + Q2c + Q2d + Q2e + Q2f) / 6$ |                                                                                                                                                  |
|                       |                                                      |                                                                                                                                                                                                                                                                                                                                                                                                                                                                                                            |                                             |                                                                                                                                                  |

Note: Items with \* were reverse coded (R) before merging them in a common variable.
